# Supplementary material for: Variability of moisture recycling using a precipitationshed framework
Source: Copernicus journal article supplement (doi:10.5194/hess-18-3937-2014), 2014-10-07
Supplement: Supplementary file [file hess-18-3937-2014-supplement.pdf]

Supplement of Hydrol. Earth Syst. Sci., 18, 3937–3950, 2014  
<http://www.hydrol-earth-syst-sci.net/18/3937/2014/>  
doi:10.5194/hess-18-3937-2014-supplement  
© Author(s) 2014. CC Attribution 3.0 License.

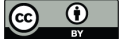

*Supplement of*

## **Variability of moisture recycling using a precipitationshed framework**

**P. W. Keys et al.**

*Correspondence to:* P. W. Keys ([patrick.keys@su.se](mailto:patrick.keys@su.se))

### Precipitationshed persistence for MERRA

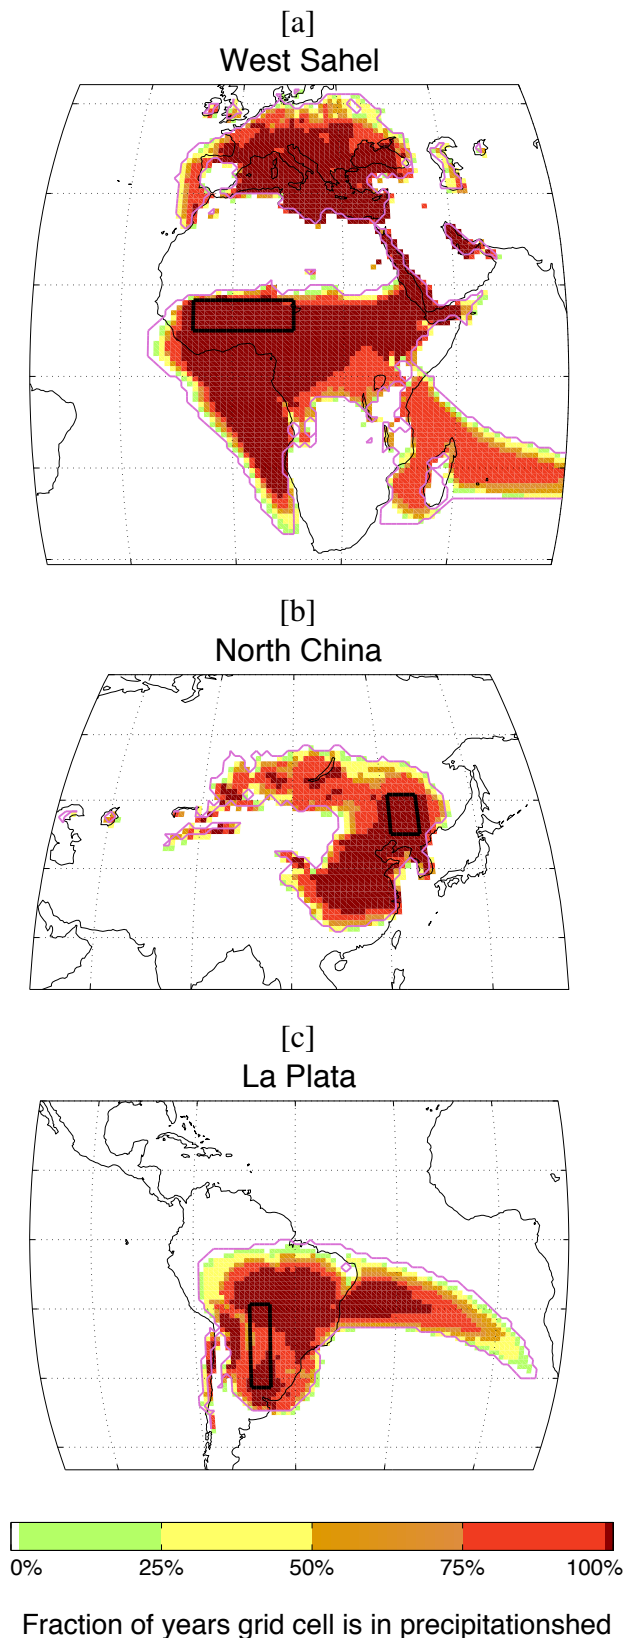

**Fig. 1.** The persistence of the Western Sahel, Northern China, and La Plata precipitationsheds for MERRA for the years 1980-2011. “Significant” is defined as greater than  $5\text{mm growing season}^{-1}$ , and the dark red areas correspond to the *core precipitationshed*, with significant contribution occurring during 100% of growing seasons. The black boxed areas are the sink regions for each precipitationshed.
